# Supplementary material
Source: publisher site journal article supplement (https://www.dovepress.com/get_supplementary_file.php?f=278918.docx)
Supplement: Supplementary file 1 [file get_supplementary_file.php]

**Supplementary materials**

Table S1: Composition of the trial batches with the input variables, X1, X2 and X3

| Formulation | MCP HCL  (mg) | NaCl  (mg)  X1 | Aerosil  (mg) | Magnesium  Stearate  (mg) | Avicel  Ph 101  (mg) | Total weight  (mg) | Orifice Size  (mm)  X2 | Coating Level  (%)  X3 |
| --- | --- | --- | --- | --- | --- | --- | --- | --- |
| F-1 | 30 | 20 | 3 | 4 | 143 | 200 | 0.5 | 14.72 |
| F-2 | 30 | 30 | 3 | 4 | 133 | 200 | 0.8 | 4 |
| F-3 | 30 | 20 | 3 | 4 | 143 | 200 | 0.5 | 8 |
| F-4 | 30 | 20 | 3 | 4 | 143 | 200 | 1 | 8 |
| F-5 | 30 | 10 | 3 | 4 | 153 | 200 | 0.8 | 12 |
| F-6 | 30 | 20 | 3 | 4 | 143 | 200 | 0.5 | 8 |
| F-7 | 30 | 10 | 3 | 4 | 153 | 200 | 0.2 | 4 |
| F-8 | 30 | 36.81 | 3 | 4 | 124.19 | 200 | 0.5 | 8 |
| F-9 | 30 | 10 | 3 | 4 | 153 | 200 | 0.2 | 12 |
| F-10 | 30 | 20 | 3 | 4 | 143 | 200 | 0.5 | 8 |
| F-11 | 30 | 20 | 3 | 4 | 143 | 200 | 0.5 | 1.27 |
| F-12 | 30 | 20 | 3 | 4 | 143 | 200 | 0.5 | 8 |
| F-13 | 30 | 10 | 3 | 4 | 153 | 200 | 0.8 | 4 |
| F-14 | 30 | 30 | 3 | 4 | 133 | 200 | 0.8 | 12 |
| F-15 | 30 | 30 | 3 | 4 | 133 | 200 | 0.2 | 12 |
| F-16 | 30 | 20 | 3 | 4 | 143 | 200 | 0.5 | 8 |
| F-17 | 30 | 20 | 3 | 4 | 143 | 200 | 0.5 | 8 |
| F-18 | 30 | 3.18 | 3 | 4 | 159.82 | 200 | 0.5 | 8 |
| F-19 | 30 | 20 | 3 | 4 | 143 | 200 | 0.00 | 8 |
| F-20 | 30 | 30 | 3 | 4 | 133 | 200 | 0.2 | 4 |

**Figure S1:** Heckel plot of the center point tablet formulation (core tablets); compression pressure (MPa) vs ln(1/(1-D))

**Figure S2: Relationship between Compression Pressure (MPa) and Tablet Hardness (kg/ cm2)**
